# Supplementary material for: Preperoxisomal vesicles can form in the absence of Pex3
Source: PubMed Central journal article supplement — J Cell Biol. 2014 Mar 3;204(5):659–68. doi: 10.1083/jcb.201310148 (PMC3941047; doi:10.1083/jcb.201310148), 2014-03-03
Supplement: supp_jcb.201310148_JCB_201310148_sm.pdf [file supp_jcb.201310148_JCB_201310148_sm.pdf]

Knoops et al., <http://www.jcb.org/cgi/content/full/jcb.201310148/DC1>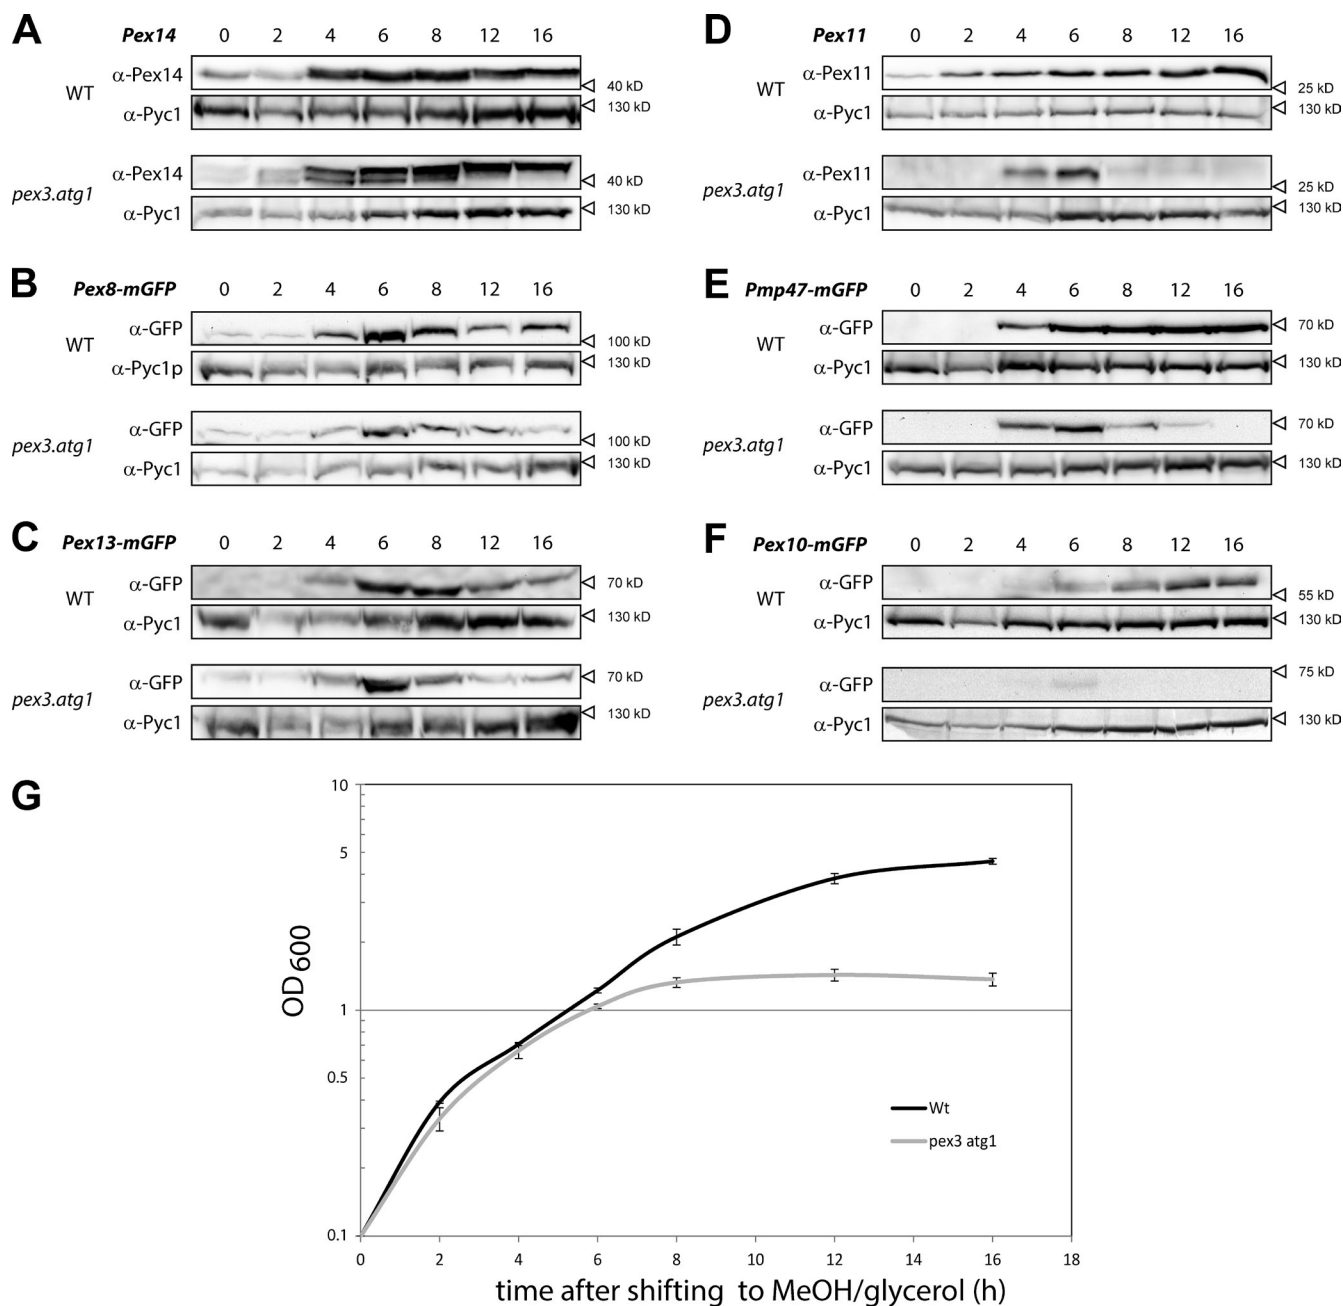

Figure S1. **Induction of PMPs in WT and *pex3 atg1* cells.** (A–F) MM-Glu grown cells were shifted to MM-M/G. Samples were taken at the indicated time points. (G) Corresponding growth curves. Error bars indicate SD of five experiments.

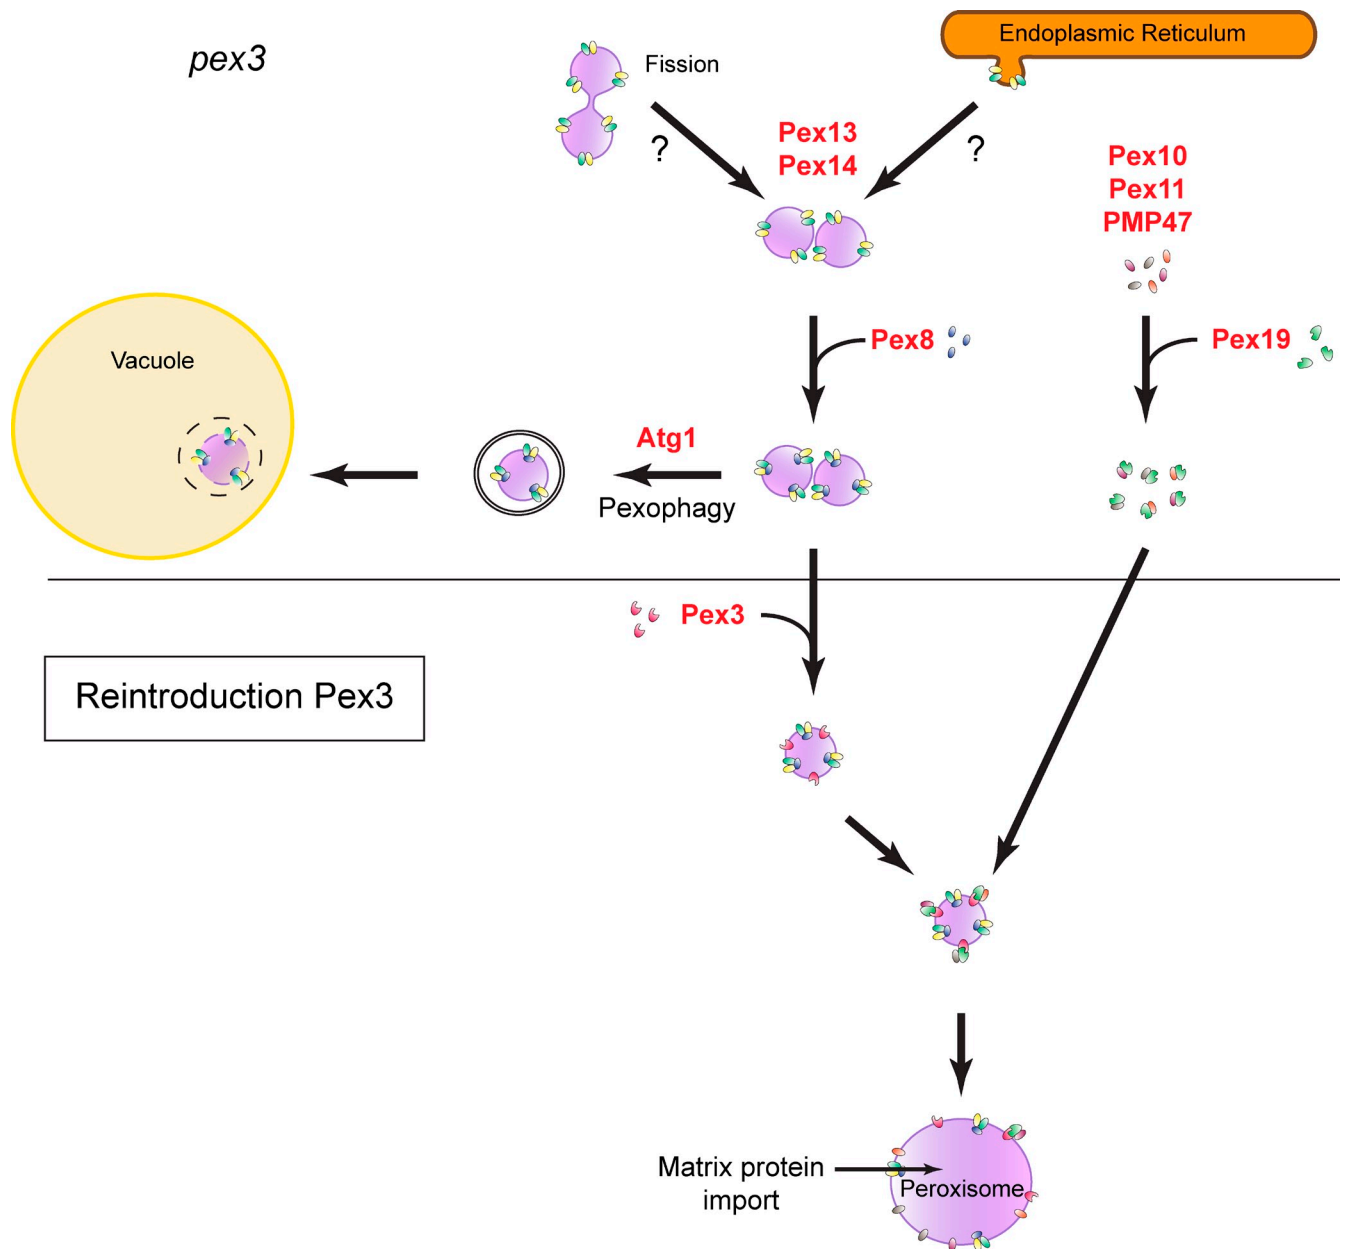

Figure S2. **Model.** In *pex3* cells, Pex13/Pex14-containing structures exist that import Pex8. These structures may arise by proliferation of a preexisting structure or form from the ER. They are constitutively degraded by autophagy, unless *ATG1* is deleted. Pex10, Pex11, and PMP47 are unstable, because they are not inserted into these structures. Reintroduced Pex3 is sorted to the structures, followed by insertion of the other PMPs by the Pex3–Pex19 machinery and import of matrix proteins.

Table S1. *H. polymorpha* strains used in this study

| Strains                                                                                | Characteristics                                                    | Reference             |
|----------------------------------------------------------------------------------------|--------------------------------------------------------------------|-----------------------|
| WT                                                                                     | NCYC 495 <i>leu1.1</i>                                             | Saraya et al., 2012   |
| <i>atg1</i>                                                                            | <i>ATG1</i> deletion strain, <i>leu1.1</i>                         | Komduur et al., 2003  |
| <i>pex3</i>                                                                            | <i>PEX3</i> deletion strain, <i>ura3</i>                           | Baerends et al., 1996 |
| <i>pex19</i>                                                                           | <i>PEX19</i> deletion strain, <i>ura3</i>                          | Otzen et al., 2004    |
| <i>pex10</i>                                                                           | <i>PEX10</i> deletion strain                                       | Tan et al., 1995      |
| <i>pex3 atg1</i>                                                                       | <i>PEX3 ATG1</i> double deletion strain                            | This study            |
| <i>pex19 atg1</i>                                                                      | <i>PEX19 ATG1</i> double deletion strain                           | This study            |
| <i>pex3 atg1.PEX14-mCherry</i>                                                         | <i>pex3 atg1</i> with pSEM01                                       | This study            |
| <i>pex3 atg1.PEX14-mCherry.PEX8-mGFP</i>                                               | <i>pex3 atg1</i> with pSEM01 and pMCE4                             | This study            |
| <i>pex3 atg1.PEX14-mCherry.PEX10-mGFP</i>                                              | <i>pex3 atg1</i> with pSEM01 and pMCE5                             | This study            |
| <i>pex3 atg1.PEX14-mCherry.PEX11-mGFP</i>                                              | <i>pex3 atg1</i> with pSEM01 and pSEM02                            | This study            |
| <i>pex3 atg1.PEX14-mCherry.PEX13-mGFP</i>                                              | <i>pex3 atg1</i> with pSEM01 and pSEM03                            | This study            |
| <i>pex3 atg1.PEX14-mCherry.PMP47-mGFP</i>                                              | <i>pex3 atg1</i> with pSEM01 and pMCE7                             | This study            |
| <i>pex3 atg1.PEX13-mGFP</i>                                                            | <i>pex3 atg1</i> with pSEM03                                       | This study            |
| <i>pex3 atg1.PEX14-mCherry-BiP<sub>N30</sub>-eGFP-HDEL</i>                             | <i>pex3 atg1</i> with pSEM01 and pRSA017                           | This study            |
| <i>pex3 atg1.PEX14-mCherry.PEX10-mGFP – P<sub>AOX</sub> PEX19</i>                      | <i>pex3 atg1</i> with pSEM01, pMCE05 and pSEM05                    | This study            |
| <i>pex3 atg1.PEX14-mCherry.PMP47-mGFP – P<sub>AOX</sub> PEX19</i>                      | <i>pex3 atg1</i> with pSEM01, pMCE07 and pSEM05                    | This study            |
| <i>pex3 atg1.PEX14-mGFP</i>                                                            | <i>pex3 atg1</i> with pSNA12                                       | This study            |
| <i>pex3 atg1 pex25</i>                                                                 | <i>pex3 atg1</i> with pRSA018                                      | This study            |
| <i>pex3 atg1 pex25.PEX14-mGFP</i>                                                      | <i>pex3 atg1 pex25</i> with pSNA12                                 | This study            |
| <i>pex3 atg1.PEX14-mCherry – P<sub>AMO</sub> PEX3-eGFP</i>                             | <i>pex3 atg1</i> with pSEM01 and pHIPZ5-P <sub>AMO</sub> PEX3-eGFP | This study            |
| <i>pex3 atg1.PEX14-mCherry.PEX10-mGFP-P<sub>AMO</sub> PEX3</i>                         | <i>pex3 atg1</i> with pSEM01, pMCE5 and pSEM04                     | This study            |
| <i>pex3 atg1.PEX14-mCherry.PMP47-mGFP-P<sub>AMO</sub> PEX3</i>                         | <i>pex3 atg1</i> with pSEM01, pMCE7 and pSEM04                     | This study            |
| <i>pex3 atg1.PEX14-mCherry – P<sub>AMO</sub> PEX3-eGFP – P<sub>TEF1</sub> eGFP-SKL</i> | <i>pex3 atg1</i> with pSEM01, pSEM04 and pAKW27                    | This study            |
| <i>pex10. PEX8-mGFP.PEX14-mCherry</i>                                                  | <i>pex10</i> with pSEM01 and pMCE4                                 | This study            |
| WT. <i>PEX13-mGFP</i>                                                                  | WT with pSEM03                                                     | This study            |
| WT. DsRed-SKL. <i>PEX8-mGFP</i>                                                        | WT. DsRed-SKL with pMCE4                                           | Cepińska et al., 2011 |
| WT. DsRed-SKL. <i>PEX10-mGFP</i>                                                       | WT. DsRed-SKL with pMCE5                                           | Cepińska et al., 2011 |
| WT. DsRed-SKL. <i>PMP47-mGFP</i>                                                       | WT. DsRed-SKL with pMCE7                                           | Cepińska et al., 2011 |
| WT. <i>PEX10-mGFP.PEX14-mCherry</i>                                                    | WT with pSEM01 and pMCE7                                           | This study            |
| WT. <i>PEX11-mGFP.PEX14-mCherry</i>                                                    | WT with pSEM01 and pMCE3                                           | This study            |
| WT. DsRed-SKL. <i>PEX13-mGFP</i>                                                       | WT. DsRed-SKL with pSEM03                                          | This study            |

Table S2. Plasmids used in this study

| Plasmid              | Characteristics                                                                                                                             | Reference             |
|----------------------|---------------------------------------------------------------------------------------------------------------------------------------------|-----------------------|
| pSEM01               | pHIPN plasmid containing C-terminal part of <i>PEX14</i> fused to mCherry; <i>nat<sup>R</sup></i> ; <i>amp<sup>R</sup></i>                  | This study            |
| pSEM02               | pHIPZ plasmid containing C-terminal part of <i>PEX11</i> fused to mGFP; <i>zeo<sup>R</sup></i> ; <i>amp<sup>R</sup></i>                     | This study            |
| pSEM03               | pHIPZ plasmid containing C-terminal part of <i>PEX13</i> fused to mGFP; <i>zeo<sup>R</sup></i> ; <i>amp<sup>R</sup></i>                     | This study            |
| pSEM04               | pHIPH5 plasmid containing <i>PEX3</i> under control of P <sub>AMO</sub> ; <i>Hph<sup>R</sup></i> ; <i>amp<sup>R</sup></i>                   | This study            |
| pSEM05               | pHIPH4 plasmid containing <i>PEX19</i> under control of P <sub>AOX</sub> ; <i>Hph<sup>R</sup></i> ; <i>amp<sup>R</sup></i>                  | This study            |
| pSEM188              | pBS plasmid containing <i>PEX19</i> deletion cassette; <i>LEU2</i> ; <i>amp<sup>R</sup></i>                                                 | This study            |
| pHIPZ5-PEX3-eGFP     | pHIPZ5 plasmid containing <i>PEX3-eGFP</i> under control of P <sub>AMO</sub> ; <i>zeo<sup>R</sup></i> ; <i>amp<sup>R</sup></i>              | Nagotu et al., 2008   |
| pRSA017              | pHIPZ4 plasmid containing BiP <sub>N30</sub> -eGFP-HDEL under control of P <sub>AOX</sub> ; <i>zeo<sup>R</sup></i> ; <i>amp<sup>R</sup></i> | Saraya et al., 2011   |
| pHIPH4               | pHIPH plasmid containing hygromycin B marker, <i>amp<sup>R</sup></i>                                                                        | Saraya et al., 2011   |
| pHIPZ7               | pHIPZ plasmid containing <i>TEF1</i> promoter, <i>zeo<sup>R</sup></i> ; <i>amp<sup>R</sup></i>                                              | Baerends et al., 1997 |
| pFEM35               | pHIPX7 plasmid containing eGFP with C-terminal PTS1 under control of P <sub>AOX</sub> ; <i>Leu2</i> ; <i>kan<sup>R</sup></i>                | Krikken et al., 2009  |
| pHIPZ-mGFP fusinator | pHIPZ plasmid containing mGFP and <i>AMO</i> terminator; <i>zeo<sup>R</sup></i> ; <i>amp<sup>R</sup></i>                                    | Saraya et al., 2010   |
| pMCE02               | pHIPN plasmid containing mCherry; <i>nat<sup>R</sup></i> ; <i>amp<sup>R</sup></i>                                                           | Cepińska et al., 2011 |
| pSNA12               | pHIPZ plasmid containing C-terminal part of <i>PEX14</i> fused to mGFP; <i>zeo<sup>R</sup></i> ; <i>amp<sup>R</sup></i>                     | Cepińska et al., 2011 |
| pMCE3                | pHIPN pPlasmid containing C-terminal part of <i>PEX11</i> fused to mCherry; <i>nat<sup>R</sup></i> ; <i>amp<sup>R</sup></i>                 | Cepińska et al., 2011 |
| pMCE4                | pHIPZ plasmid containing C-terminal part of <i>PEX8</i> fused to mGFP; <i>zeo<sup>R</sup></i> ; <i>amp<sup>R</sup></i>                      | Cepińska et al., 2011 |
| pRSA018              | pDEST-R4-R3 containing <i>PEX25</i> deletion cassette, <i>nat<sup>R</sup></i> ; <i>amp<sup>R</sup></i>                                      | Saraya et al., 2011   |
| pMCE5                | pHIPZ plasmid containing C-terminal part of <i>PEX10</i> fused to GFP; <i>zeo<sup>R</sup></i> ; <i>amp<sup>R</sup></i>                      | Cepińska et al., 2011 |
| pMCE7                | pHIPZ plasmid containing C-terminal part of <i>PMP47</i> fused to GFP; <i>zeo<sup>R</sup></i> ; <i>amp<sup>R</sup></i>                      | Cepińska et al., 2011 |
| pAKW27               | pHIPZ plasmid containing eGFP-SKL under control of P <sub>TEF1</sub> ; <i>zeo<sup>R</sup></i> ; <i>amp<sup>R</sup></i>                      | This study            |
| pHOR30b              | pBS plasmid containing <i>PEX19</i> deletion cassette; <i>URA3</i> ; <i>amp<sup>R</sup></i>                                                 | Otzen et al., 2004    |
| pBS-CaLeu2           | pBS plasmid containing <i>C. albicans LEU2</i> gene; <i>amp<sup>R</sup></i>                                                                 | Otzen et al., 2004    |

Table S3. Primers used in this study

| Primer  | Sequence                                   | Reference           |
|---------|--------------------------------------------|---------------------|
| Pex25-F | 5'-CTGGATGGAGGCTTCATCTC-3'                 | Saraya et al., 2011 |
| Pex25-R | 5'-GGAGCTGCTGTGCTTGTATG-3'                 | Saraya et al., 2011 |
| H5-F    | 5'-GTGCTGCAAGGCGATTAAGT-3'                 | This study          |
| H5-R    | 5'-AGAGCTCGAGGTTAAGCATCGAAATTAGAGTAGAC-3'  | This study          |
| Pex13-F | 5'-AAAAGCTTATGACTACACCACGTCCAAAGCC-3'      | This study          |
| Pex13-R | 5'-AAAGATCTGATCAATAGCTTTTGTATCTTTCTGAAC-3' | This study          |
| Pex14-F | 5'-CCCAAGCTTCGTTGCAGGAAGTCGACGAA-3'        | This study          |
| Pex14-R | 5'-AGATCTTCCGGCATTGAGTCCACGCCG-3'          | This study          |
| Pex19-F | 5'-AAAAGCTTATGAGCGAGAAAAAGTCC-3'           | This study          |
| Pex19-R | 5'-ATCTAGACTATGTTTGTGCAAGTGTCTTCC-3'       | This study          |

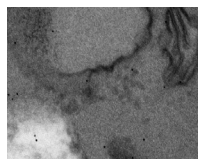

Video 1. **Electron tomography of pex3 atg1 cells.** Two perpendicular tilt series ( $-70^\circ$  to  $70^\circ$ ) were acquired of 150-nm sections of  $\text{KMnO}_4$ -fixed cells with a transmission EM microscope (Tecnai 12; FEI) and reconstructed into a single tomographic volume by IMOD. Organelle masks were segmented manually in Amira followed by nonlinear anisotropic diffusion filtering, thresholding, and 3D surface rendering, using an identical color scheme as in Fig. 1 E.

## References

- Baerends, R.J., S.W. Rasmussen, R.E. Hilbrands, M. van der Heide, K.N. Faber, P.T. Reuvekamp, J.A. Kiel, J.M. Cregg, I.J. van der Klei, and M. Veenhuis. 1996. The *Hansenula polymorpha* PER9 gene encodes a peroxisomal membrane protein essential for peroxisome assembly and integrity. *J. Biol. Chem.* 271:8887–8894. <http://dx.doi.org/10.1074/jbc.271.15.8887>
- Baerends, R.J., F.A. Salomons, K.N. Faber, J.A. Kiel, I.J. Van der Klei, and M. Veenhuis. 1997. Deviant Pex3p levels affect normal peroxisome formation in *Hansenula polymorpha*: high steady-state levels of the protein fully abolish matrix protein import. *Yeast.* 13:1437–1448. [http://dx.doi.org/10.1002/\(SICI\)1097-0061\(199712\)13:15<1437::AID-YEA192>3.0.CO;2-U](http://dx.doi.org/10.1002/(SICI)1097-0061(199712)13:15<1437::AID-YEA192>3.0.CO;2-U)
- Cepińska, M.N., M. Veenhuis, I.J. van der Klei, and S. Nagotu. 2011. Peroxisome fission is associated with reorganization of specific membrane proteins. *Traffic.* 12:925–937. <http://dx.doi.org/10.1111/j.1600-0854.2011.01198.x>
- Komduur, J.A., M. Veenhuis, and J.A. Kiel. 2003. The *Hansenula polymorpha* PDD7 gene is essential for macropexophagy and microautophagy. *FEMS Yeast Res.* 3:27–34.
- Krikken, A.M., M. Veenhuis, and I.J. van der Klei. 2009. *Hansenula polymorpha* pex11 cells are affected in peroxisome retention. *FEBS J.* 276:1429–1439. <http://dx.doi.org/10.1111/j.1742-4658.2009.06883.x>
- Nagotu, S., R. Saraya, M. Otzen, M. Veenhuis, and I.J. van der Klei. 2008. Peroxisome proliferation in *Hansenula polymorpha* requires Dnm1p which mediates fission but not *de novo* formation. *Biochim. Biophys. Acta.* 1783:760–769. <http://dx.doi.org/10.1016/j.bbamcr.2007.10.018>
- Otzen, M., U. Perband, D. Wang, R.J.S. Baerends, W.H. Kunau, M. Veenhuis, and I.J. Van der Klei. 2004. *Hansenula polymorpha* Pex19p is essential for the formation of functional peroxisomal membranes. *J. Biol. Chem.* 279:19181–19190. <http://dx.doi.org/10.1074/jbc.M314275200>
- Saraya, R., M.N. Cepińska, J.A. Kiel, M. Veenhuis, and I.J. van der Klei. 2010. A conserved function for Inp2 in peroxisome inheritance. *Biochim. Biophys. Acta.* 1803:617–622. <http://dx.doi.org/10.1016/j.bbamcr.2010.02.001>
- Saraya, R., A.M. Krikken, M. Veenhuis, and I.J. van der Klei. 2011. Peroxisome reintroduction in *Hansenula polymorpha* requires Pex25 and Rho1. *J. Cell Biol.* 193:885–900. <http://dx.doi.org/10.1083/jcb.201012083>
- Saraya, R., A.M. Krikken, J.A. Kiel, R.J. Baerends, M. Veenhuis, and I.J. van der Klei. 2012. Novel genetic tools for *Hansenula polymorpha*. *FEMS Yeast Res.* 12:271–278. <http://dx.doi.org/10.1111/j.1567-1364.2011.00772.x>
- Tan, X., H.R. Waterham, M. Veenhuis, and J.M. Cregg. 1995. The *Hansenula polymorpha* PER8 gene encodes a novel peroxisomal integral membrane protein involved in proliferation. *J. Cell Biol.* 128:307–319. <http://dx.doi.org/10.1083/jcb.128.3.307>
